# Supplementary material
Source: PubMed Central journal article supplement (PMC4810611)
Supplement: JB.00704-15_zjb999093937so1.pdf [file JB.00704-15_zjb999093937so1.pdf]

**Fig. S1. *Vibrio cholerae* wild-type excision.** N16961 (serogroup O1 biotype El Tor), O395 (O1 classical) and MO2 (O139). *Vibrio cholerae* SG-7 (O56) does not contain VPI-1 or VPI-2 and served as a negative control.

**Fig.S2. A.** Conserved domains of IntV1 and IntV2. Amino acid alignment of IntV1 (gi: 9655299) and IntV2 (gi: 15641762) using the MUSCLE algorithm in Jalview. Both integrases share three conserved domains (represented by blocks in sequential order): DUF4102 (pfam13356) domain (IntV1: 5-94, IntV2: 8-97), SAM-like domain (pfam14659) (IntV1: 103-151, IntV2: 106-157) and the C-terminal domain contained a P4 catalytic domain (pfam00589) (IntV1: 213-390, IntV2: 215-393). The highly conserved active site residues are marked by triangles. **B.** Predicted secondary structure of N-terminus VpiT and TorI. In search for an unannotated RDF, the HHPred server identified a 52 amino acid region near the N-terminus of VpiT as having a distant relationship to TorI, a previously characterized excisionase. Although the shared identity in this region was 12% and the e-value of 0.0061, the predicted secondary structures of these regions were near identical.

**Fig. S3 Mobile integrative genetic element (MIGE) recombination modules.** A comparison of the genetic organization of the two *V. cholerae* VPIs examined in this study with the bacteriophage  $\lambda$  and the *E.coli* prophage KpIE1. Contrary to bacteriophage  $\lambda$  the integrases of the VPIs and KpIE1 possess promoter regions that overlap with attachment sites, making them accessible for regulation by intasome binding proteins. Additionally, the genetic organization reveals that the RDF(s) and integrase of VPI-2 and KpIE1 are not co-regulated as they are in bacteriophage  $\lambda$ . The

position of *vefB* also exposes the gene for possible regulation by intasome binding proteins.

**Fig. S4 VefA and VefB bind the 1<sup>st</sup> half *attL2* site at a higher affinity. A.**

Representation of the 1<sup>st</sup> and 2<sup>nd</sup> half fragments of the *attL2* DNA sequence, amplified with primer pairs attL2Fwd/attL2BRev and attL2CFwd/attL2Rev, respectively (Table S1), used for electrophoretic mobility shift assays (EMSAs). **B.** Varying concentrations of VefA (0 – 46  $\mu$ M) with *attL2* 1<sup>st</sup> half (30 ng) and 2<sup>nd</sup> half (30 ng). Binding is observed at 23  $\mu$ M for the first half. **C.** Varying concentrations of VefB (0 - 23.1  $\mu$ M) with *attL2* 1<sup>st</sup> half (30 ng) and 2<sup>nd</sup> half (30 ng). Binding is observed at 2.8  $\mu$ M and 2.4  $\mu$ M for the 1<sup>st</sup> and 2<sup>nd</sup> half, respectively. **D.** EMSA using control *V. vulnificus* DNA (30 ng) with varying concentrations of VefA (0 – 12  $\mu$ M) and VefB (0 - 4.19  $\mu$ M). No binding was observed.

**Fig. S5. Distribution of Vefs in Bacteria.** A BLAST analysis revealed over 3,000 representatives (among 105 genera and 283 species) with equal to or greater than 70% query cover and 40% identity to the *V. cholerae* RDFs. A visual representation of these results was created using the Krona visualization tool (59). Link to interactive view: <file:///C:/Users/Megan%20Carpenter/Desktop/Crosstalk%20Paper/Krona/FamilyGenusNopecies.html?dataset=0&node=0&collapse=true&color=false&depth=2&font=11&key=true>

**Fig. S6. *Vibrio* island regions inserted at tmRNA genes containing RDFs. A)** Island regions of *V. cholerae* and other Vibrionaceae which contain IntV1 homologs inserted at tmRNA genes as well as Vef homologs. Note the genetic variation of the gene content of each island. *Vibrio vulnificus* island (VVI) - 5. **B)** Strain name with % homology to *V. cholerae* N16961 IntV1 and RDFs VefA, VefB or VefC. These

observations suggest an evolutionary relationship between IntV1 and the Vefs, supporting the VPI-1 cross-talk hypothesis.

**Table S1. Primers used in this study**

| Primer Name                          | Sequence (5' → 3')                                              | Product size (bp) |
|--------------------------------------|-----------------------------------------------------------------|-------------------|
| <b>Mutant Construction</b>           |                                                                 |                   |
| VC0817A                              | tctagaAAGCTGCGATAGGGAGCT                                        | 520               |
| VC0817B                              | ACCACAGCGTCGACATACGAG                                           |                   |
| VC0817C                              | <u>CTCGTATGTCGACGCTGTGGT</u><br>ATCAAGAAAGAGCGGTTTCAAG          | 561               |
| VC0817D                              | gagctcGGCTAACGTCCCTATAGTC                                       |                   |
| VC0817FF                             | AGCTCTTCCATCGACAACACCTCT                                        | 2,200             |
| VC0817FR                             | TCGCCAGTGGAAGCAGAGCA                                            |                   |
| VC0847A                              | tctagaTAGCCATTTCGTTAGCGTGTC                                     | 556               |
| VC0847B                              | ATCGTCTTGTGGATCGATGC                                            |                   |
| VC0847C                              | <u>GCATCGATCCACAAGACGAT</u><br>AGAGGTAGCCTATCTGTGAC             | 548               |
| VC0847D                              | gagctcTGAGGATCCATGATATCCGC                                      |                   |
| VC0847FF                             | CTAGCTTCCGCTTGTAAAGAC                                           | 2,287             |
| VC0847FR                             | TACTAACGGGTATCGAACTC                                            |                   |
| cnVC1758A                            | tctagaGATTTCGGTGAGTTGTCCGAG                                     | 531               |
| cnVC1758B                            | TTGCCATGAGCGAGAATTGC                                            |                   |
| cnVC1758C                            | <u>GCAATTCTCGTCTATGGCAA</u><br>GGAAGTTACAGTGTGGCTGG             | 578               |
| cnVC1758D                            | gagctcTCAGTAAACAGAAAGGCTGCC                                     |                   |
| cnVC1758FF                           | AAGCAAACGCACTCAATGCG                                            | 2,285             |
| cnVC1758FR                           | CTGGTCGACAAGATTGTCTG                                            |                   |
| VC0497A                              | GtctctagaGTACTCTTGCGATGCGTTTGG                                  | 541               |
| VC0497B                              | TCGTAGAAATTCATGGGAATTGTC                                        |                   |
| VC0497C                              | <u>GACAATTCCTCATGAGATTTCTACGA</u><br>GAATCCTTTTCAGTAACACAAACATC | 554               |
| VC0497D                              | CgagctcCGCTTCAACCGCTAACAGGT                                     |                   |
| VC0497FF                             | CGAACACAACCCACCTTCCAACC                                         | 1,345             |
| VC0497FR                             | GAGTCTGAACAACCTGATTGG                                           |                   |
| <b>Excision Assays (<i>attP</i>)</b> |                                                                 |                   |
| InvVC0847B                           | ATCGTCTTGTGGATCGATGC                                            | 744               |
| Inv/NestVC0817R2                     | GCATCACCACATTCTCATAAC                                           |                   |
| NestVC0847F3                         | TTTCTCTCTAGGTTTGGAGG                                            | 483               |
| NestVC0817R3                         | CTCTGTCCATAGACACCCAG                                            |                   |
| VPI-2 InvVC1808F                     | AGCTAGACAGATTAGCTAACC                                           | 1,352             |
| CnVC1758B                            | TTGCCATGAGCGAGAATTGC                                            |                   |
| NestVC1758comR                       | AGAATTGCTTGGACGTACGC                                            | 461               |
| NestVC1809comF                       | GCGTAACTGAGAAAAGTGTG                                            |                   |
| <b>Excision Assays (<i>attB</i>)</b> |                                                                 |                   |
| VPI-1 attBF1                         | ATAGGGAGCTGGGCGTTAAT                                            | 428               |
| VPI-1 attBR1                         | TGTAAGACGGGGAAATCAGG                                            |                   |
| VPI-1 attBF2                         | TTGATGAGACGCTCTGAACC                                            | 217               |
| VPI-1 attBR2                         | ATTCGTTAGCGTGTCCG                                               |                   |
| VPI-2 fk1                            | CTGGCTATGAGCTGATTTG                                             | 1,449             |
| VPI-2 fk2                            | AGGGATTGGCTTTGAGG                                               |                   |
| VPI-2attF                            | AGAGTAAAAGTCGCCAAAGC                                            | 524               |
| VPI-2attR                            | GGGTGCAATTTTCGCATGTTGC                                          |                   |
| <b>Complementation</b>               |                                                                 |                   |
| VC0847F                              | gagctcAGGTACTACTACAAGGTACAC                                     | 1,385             |
| VC0847R                              | tctagaAGCGTATTCCACTGACAACC                                      |                   |

|                           |                                 |       |
|---------------------------|---------------------------------|-------|
| VC1758F                   | ggtaccGAGCTCGCTTTGAATATAGG      | 1,303 |
| VC1758R                   | gagctcGAGTCCTCATGCTCTAGCCAG     |       |
| VC1785F                   | tctagaGGCATGCTGGTGTGTTACTAC     | 414   |
| VC1785R                   | tctagaGACGCATGTATAATCACGC       |       |
| VC1809F                   | gagctcGTGGTTGATAGGCAATTGCAC     | 414   |
| VC1809R                   | ctgcagGATCACACAAGTAAACCAGC      |       |
| VC0497F                   | gagctcCAGTGGCGGCTTATCCATGG      | 293   |
| VC0497R                   | ctgcagCAGCGCCCTGTTGATGATGT      |       |
| <b>Protein Expression</b> |                                 |       |
| BamHIVC1785R              | CTCGGATCCTCATCGCTGTTTAAGAC      | 225   |
| NcoIVC1785F               | TGCCCATGGATGGGACAACAAGACATAG    |       |
| VefAmutRev                | CATGGACTGAAAATACAGG             |       |
| VefAmutFwd                | GGACAACAAGACATAGGAG             |       |
| NcoIVefBFwd               | TGCCCATGGGATTGCAACTAACCAACCTGAG | 251   |
| BamHIVefBRev              | CTCGGATCCCTAATCCATTGACGATTGG    |       |
| <b>Binding Assays</b>     |                                 |       |
| attL2Fwd                  | TCTCACTCACCGCCACATTCAA          | 327   |
| attL2Rev                  | GCCATTTCAATCCCTCAAGT            |       |
| attR1Fwd                  | GATGGGTACACCAGATTAACACG         | 190   |
| attR1Rev                  | CCCCAGCTCCACCAAATCATAG          |       |
| attL2BRev                 | GTGGGTAGCTGGGTATTACTT           |       |
| attL2CFwd                 | AAGTAATACCCAGCTACCCAC           |       |
| VV1_0809A                 | tctagaAGCCAGGGTTTAACTACCGC      | 440   |
| VV1_0809B                 | GGCTGAGTAAGCACGTTGA             |       |

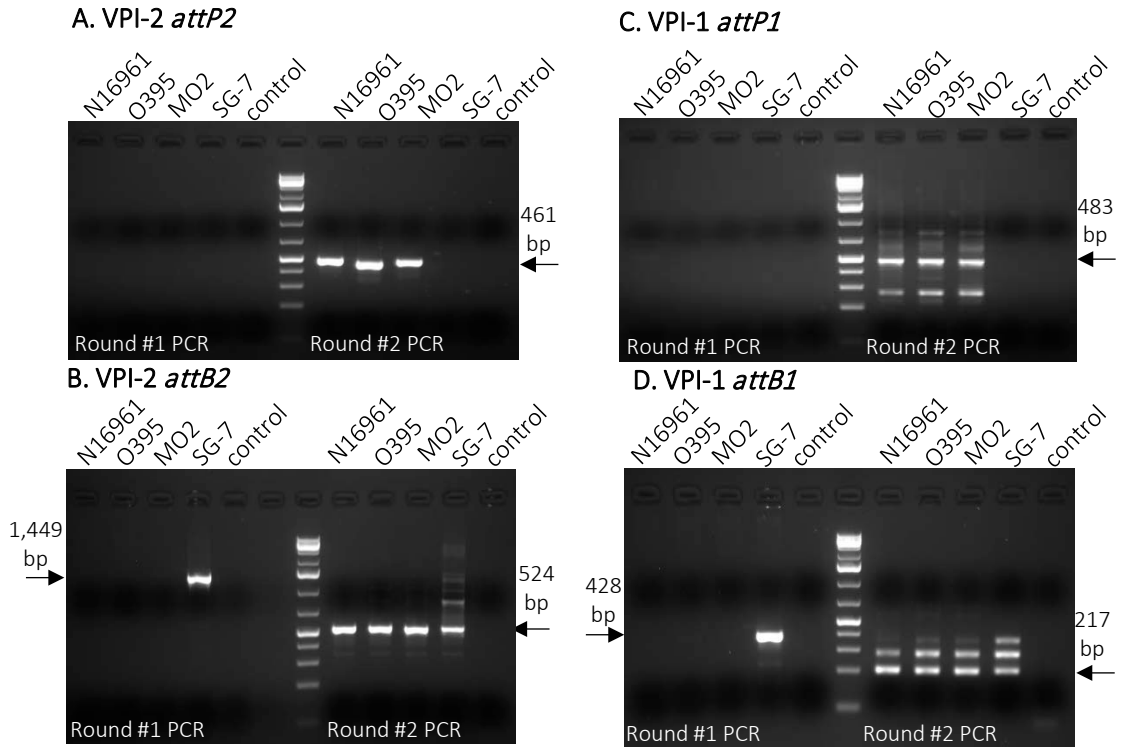

Figure S1

## A. IntV1 and IntV2 sequence alignment

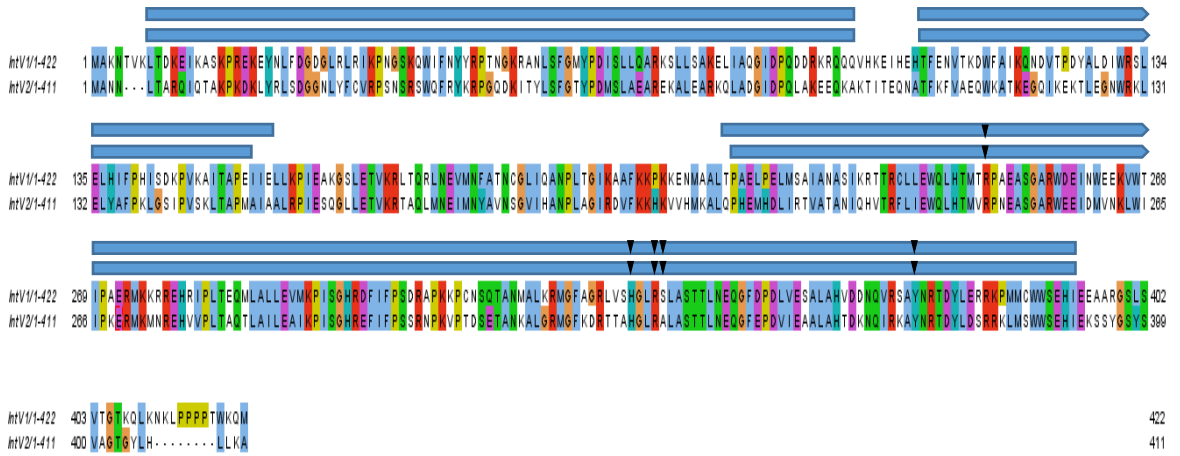

## B. IntV1 and IntV2 sequence alignment

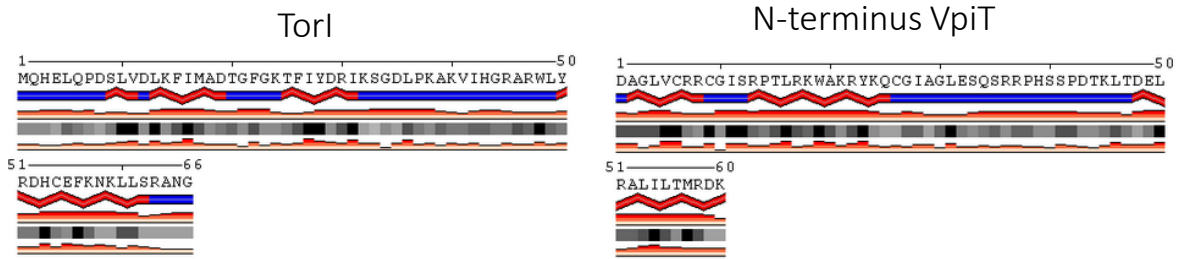

Figure S2

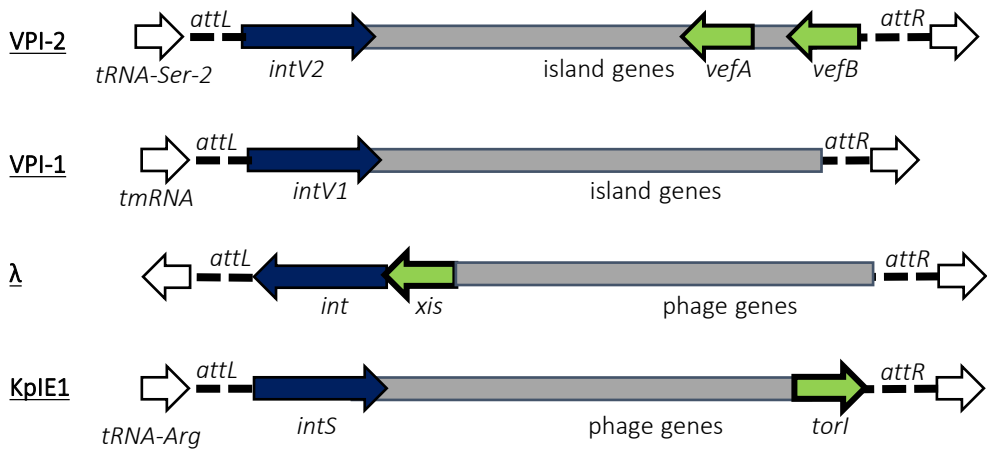

Figure S3

A

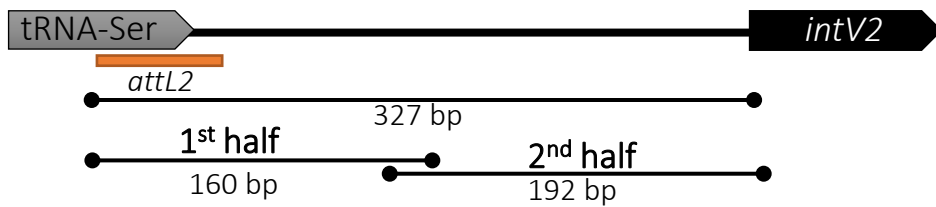

B

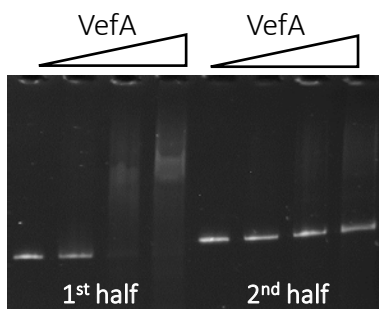

C

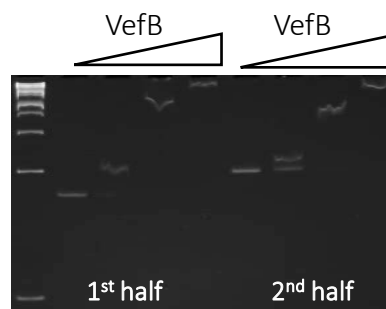

D

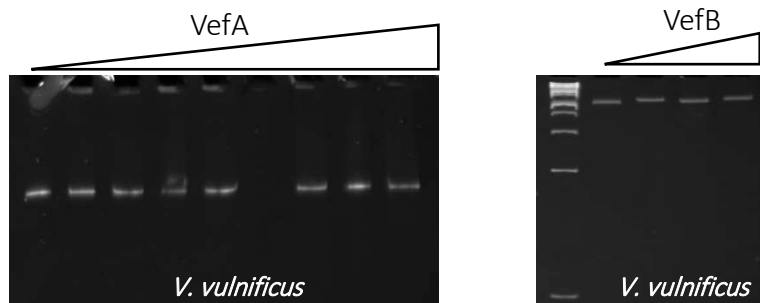

Figure S4





**A**

*Vibrio cholerae* sv Inaba 12129(1)

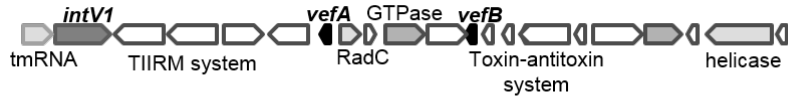

*Vibrio cholerae* CT 5369-93

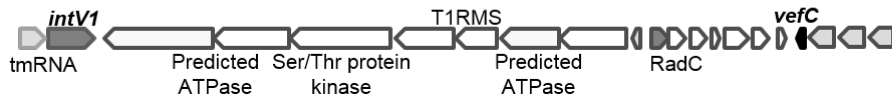

*Vibrio cholerae* sv. O135 RC385

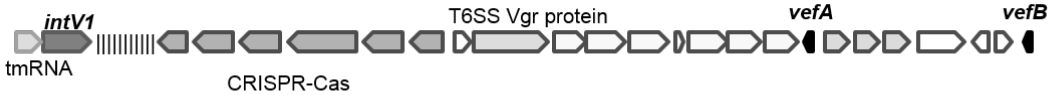

*Listonella anguillarum* sv. O1 96F

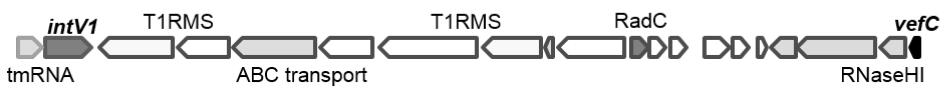

*Vibrio cholerae* HE-09

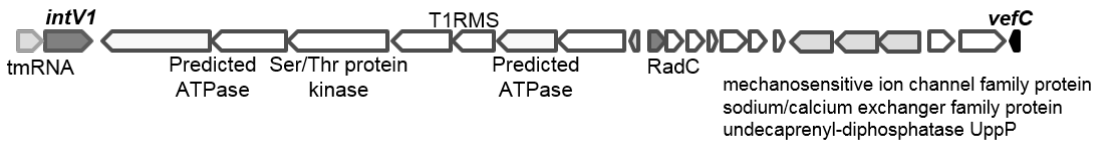

*Vibrio diazotrophicus* NBRC 103148

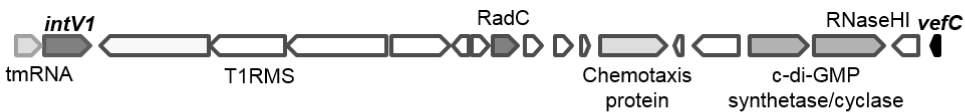

*Vibrio vulnificus* YJ016 VVI-V

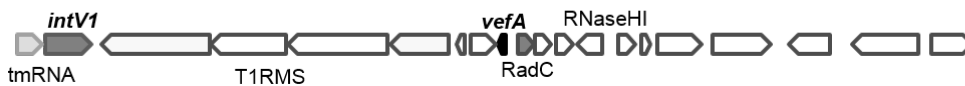

**B**

| Strain                                   | IntV1 | VefA | VefB | VefC |
|------------------------------------------|-------|------|------|------|
| <i>V. cholerae</i> sv Inaba 12129(1)     | 93%   | 99%  | 83%  |      |
| <i>V. cholerae</i> CT 5369-93            | 81%   |      |      | 98%  |
| <i>V. cholerae</i> sv. O135 RC385        | 100%  | 91%  | 97%  |      |
| <i>Listonella anguillarum</i> sv. O1 96F | 82%   |      |      | 94%  |
| <i>V. cholerae</i> HE-09                 | 81%   |      |      | 100% |
| <i>V. diazotrophicus</i> NBRC 103148     | 81%   |      |      | 94%  |
| <i>V. vulnificus</i> YJ016               | 81%   | 88%  |      |      |

Figure S6
